# Supplementary material for: A multiscale approximation in a heat shock response model of E. coli
Source: PubMed Central journal article supplement (PMC3608964; doi:10.1186/1752-0509-6-143), 2012-11-21
Supplement: 1752-0509-6-143-S1.pdf [file 1752-0509-6-143-S1.pdf]

# Supplementary material for “A multiscale approximation in a heat shock response model of *E. coli*”

Hye-Won Kang\*

<sup>1</sup> Mathematical Biosciences Institute, Ohio State University, Columbus, OH, USA

Email: kang.235@mbi.osu.edu;

\*Corresponding author

## 1 The scaled stochastic equations

The stochastic equation governing the species numbers is

$$X(t) = X(0) + \sum_{k=1}^{r_0} R_k^t(\lambda_k(X))(\nu'_k - \nu_k),$$

where

$$R_k^t(\lambda_k(X)) = Y_k \left( \int_0^t \lambda_k(X(s)) ds \right),$$

and the  $Y_k$ 's are independent unit Poisson processes. Let  $\Lambda_N$  be an  $s_0 \times s_0$ -dimensional diagonal matrix with entries  $N^{-\alpha_i}$ . The process for the scaled species numbers after a time change is described by

$$Z^{N,\gamma}(t) = Z^{N,\gamma}(0) + \Lambda_N \sum_{k=1}^{r_0} R_k^t \left( N^{\gamma+\rho_k} \hat{\lambda}_k(Z^{N,\gamma}) \right) (\nu'_k - \nu_k).$$

The process  $Z^{N,\gamma}$  is an  $s_0$ -dimensional vector with each component written as

$$\begin{aligned} Z_1^{N,\gamma}(t) &= Z_1^{N,\gamma}(0) + N^{-\alpha_1} \left[ R_{13}^t(N^{\gamma+\rho_{13}} \kappa_{13}) - R_{14}^t(N^{\gamma+\rho_{14}} \kappa_{14} Z_1^{N,\gamma}) \right], \\ Z_2^{N,\gamma}(t) &= Z_2^{N,\gamma}(0) + N^{-\alpha_2} \left[ R_3^t(N^{\gamma+\rho_3} \kappa_3 Z_3^{N,\gamma}) + R_4^t(N^{\gamma+\rho_4} \kappa_4 Z_1^{N,\gamma}) \right. \\ &\quad + R_5^t(N^{\gamma+\rho_5} \kappa_5 Z_3^{N,\gamma}) + R_6^t(N^{\gamma+\rho_6} \kappa_6 Z_3^{N,\gamma}) + R_7^t(N^{\gamma+\rho_7} \kappa_7 Z_3^{N,\gamma}) \\ &\quad + R_8^t(N^{\gamma+\rho_8} \kappa_8 Z_7^{N,\gamma}) - R_2^t(N^{\gamma+\rho_2} \kappa_2 Z_2^{N,\gamma}) \\ &\quad \left. - R_9^t(N^{\gamma+\rho_9} \kappa_9 Z_2^{N,\gamma} Z_6^{N,\gamma}) \right], \\ Z_3^{N,\gamma}(t) &= Z_3^{N,\gamma}(0) + N^{-\alpha_3} \left[ R_2^t(N^{\gamma+\rho_2} \kappa_2 Z_2^{N,\gamma}) - R_3^t(N^{\gamma+\rho_3} \kappa_3 Z_3^{N,\gamma}) \right. \\ &\quad \left. - R_5^t(N^{\gamma+\rho_5} \kappa_5 Z_3^{N,\gamma}) - R_6^t(N^{\gamma+\rho_6} \kappa_6 Z_3^{N,\gamma}) - R_7^t(N^{\gamma+\rho_7} \kappa_7 Z_3^{N,\gamma}) \right], \end{aligned}$$

$$\begin{aligned}
Z_4^{N,\gamma}(t) &= Z_4^{N,\gamma}(0) + N^{-\alpha_4} \left[ R_6^t(N^{\gamma+\rho_6} \kappa_6 Z_3^{N,\gamma}) - R_{18}^t(N^{\gamma+\rho_{18}} \kappa_{18} Z_4^{N,\gamma}) \right], \\
Z_5^{N,\gamma}(t) &= Z_5^{N,\gamma}(0) + N^{-\alpha_5} \left[ R_5^t(N^{\gamma+\rho_5} \kappa_5 Z_3^{N,\gamma}) - R_{16}^t(N^{\gamma+\rho_{16}} \kappa_{16} Z_5^{N,\gamma}) \right], \\
Z_6^{N,\gamma}(t) &= Z_6^{N,\gamma}(0) + N^{-\alpha_6} \left[ R_7^t(N^{\gamma+\rho_7} \kappa_7 Z_3^{N,\gamma}) + R_8^t(N^{\gamma+\rho_8} \kappa_8 Z_7^{N,\gamma}) \right. \\
&\quad + R_{12}^t(N^{\gamma+\rho_{12}} \kappa_{12} Z_9^{N,\gamma}) + R_{15}^t(N^{\gamma+\rho_{15}} \kappa_{15} Z_4^{N,\gamma} Z_7^{N,\gamma}) \\
&\quad - R_9^t(N^{\gamma+\rho_9} \kappa_9 Z_2^{N,\gamma} Z_6^{N,\gamma}) - R_{10}^t(N^{\gamma+\rho_{10}} \kappa_{10} Z_6^{N,\gamma} Z_8^{N,\gamma}) \\
&\quad \left. - R_{17}^t(N^{\gamma+\rho_{17}} \kappa_{17} Z_6^{N,\gamma}) \right], \\
Z_7^{N,\gamma}(t) &= Z_7^{N,\gamma}(0) + N^{-\alpha_7} \left[ R_9^t(N^{\gamma+\rho_9} \kappa_9 Z_2^{N,\gamma} Z_6^{N,\gamma}) - R_8^t(N^{\gamma+\rho_8} \kappa_8 Z_7^{N,\gamma}) \right. \\
&\quad \left. - R_{15}^t(N^{\gamma+\rho_{15}} \kappa_{15} Z_4^{N,\gamma} Z_7^{N,\gamma}) \right], \\
Z_8^{N,\gamma}(t) &= Z_8^{N,\gamma}(0) + N^{-\alpha_8} \left[ R_1^t(N^{\gamma+\rho_1} \kappa_1) + R_{12}^t(N^{\gamma+\rho_{12}} \kappa_{12} Z_9^{N,\gamma}) \right. \\
&\quad \left. - R_{10}^t(N^{\gamma+\rho_{10}} \kappa_{10} Z_6^{N,\gamma} Z_8^{N,\gamma}) - R_{11}^t(N^{\gamma+\rho_{11}} \kappa_{11} Z_8^{N,\gamma}) \right], \\
Z_9^{N,\gamma}(t) &= Z_9^{N,\gamma}(0) + N^{-\alpha_9} \left[ R_{10}^t(N^{\gamma+\rho_{10}} \kappa_{10} Z_6^{N,\gamma} Z_8^{N,\gamma}) - R_{12}^t(N^{\gamma+\rho_{12}} \kappa_{12} Z_9^{N,\gamma}) \right].
\end{aligned}$$

In each reaction term,  $R_k^t$ , the propensity includes  $N^{\gamma+\rho_k}$  produced from scaling the species numbers in the propensity and from change of the time variable.  $\rho_k$ 's are given in the following table in terms of  $\alpha_i$ 's and  $\beta_k$ 's.

Table 1: Scaling exponents in propensities

| $\rho_k$                      | $\rho_k$                                       | $\rho_k$                                       |
|-------------------------------|------------------------------------------------|------------------------------------------------|
| $\rho_1$ $\beta_1$            | $\rho_7$ $\alpha_3 + \beta_7$                  | $\rho_{13}$ $\beta_{13}$                       |
| $\rho_2$ $\alpha_2 + \beta_2$ | $\rho_8$ $\alpha_7 + \beta_8$                  | $\rho_{14}$ $\alpha_1 + \beta_{14}$            |
| $\rho_3$ $\alpha_3 + \beta_3$ | $\rho_9$ $\alpha_2 + \alpha_6 + \beta_9$       | $\rho_{15}$ $\alpha_4 + \alpha_7 + \beta_{15}$ |
| $\rho_4$ $\alpha_1 + \beta_4$ | $\rho_{10}$ $\alpha_6 + \alpha_8 + \beta_{10}$ | $\rho_{16}$ $\alpha_5 + \beta_{16}$            |
| $\rho_5$ $\alpha_3 + \beta_5$ | $\rho_{11}$ $\alpha_8 + \beta_{11}$            | $\rho_{17}$ $\alpha_6 + \beta_{17}$            |
| $\rho_6$ $\alpha_3 + \beta_6$ | $\rho_{12}$ $\alpha_9 + \beta_{12}$            | $\rho_{18}$ $\alpha_4 + \beta_{18}$            |

## 2 Identities

In this section, the governing equations for the linear combinations of the species used in this paper are given. Denote addition of species  $S_2$  and  $S_3$  as  $S_{23}$ , addition of species  $S_6$  and  $S_7$  as  $S_{67}$ , addition of  $S_2$ ,  $S_3$ , and  $S_7$  as  $S_{237}$ , and addition of  $S_6$ ,  $S_7$ , and  $S_9$  as  $S_{679}$ . Define variables for the normalized numbers of the

linear combinations of the species,  $S_{23}$ ,  $S_{67}$ ,  $S_{237}$ , and  $S_{679}$  as

$$\begin{aligned} Z_{23}^{N,\gamma}(t) &\equiv \frac{N^{\alpha_2} Z_2^{N,\gamma}(t) + N^{\alpha_3} Z_3^{N,\gamma}(t)}{N^{\max(\alpha_2, \alpha_3)}}, \\ Z_{67}^{N,\gamma}(t) &\equiv \frac{N^{\alpha_6} Z_6^{N,\gamma}(t) + N^{\alpha_7} Z_7^{N,\gamma}(t)}{N^{\max(\alpha_6, \alpha_7)}}, \\ Z_{237}^{N,\gamma}(t) &\equiv \frac{N^{\alpha_2} Z_2^{N,\gamma}(t) + N^{\alpha_3} Z_3^{N,\gamma}(t) + N^{\alpha_7} Z_7^{N,\gamma}(t)}{N^{\max(\alpha_2, \alpha_3, \alpha_7)}}, \\ Z_{679}^{N,\gamma}(t) &\equiv \frac{N^{\alpha_6} Z_6^{N,\gamma}(t) + N^{\alpha_7} Z_7^{N,\gamma}(t) + N^{\alpha_9} Z_9^{N,\gamma}(t)}{N^{\max(\alpha_6, \alpha_7, \alpha_9)}}. \end{aligned}$$

The stochastic equations for the linear combinations of the species are given as

$$\begin{aligned} Z_{23}^{N,\gamma}(t) &= Z_{23}^{N,\gamma}(0) + N^{-\max(\alpha_2, \alpha_3)} \left[ R_4^t(N^{\gamma+\rho_4} \kappa_4 Z_1^{N,\gamma}) + R_8^t(N^{\gamma+\rho_8} \kappa_8 Z_7^{N,\gamma}) \right. \\ &\quad \left. - R_9^t(N^{\gamma+\rho_9} \kappa_9 Z_2^{N,\gamma} Z_6^{N,\gamma}) \right], \\ Z_{67}^{N,\gamma}(t) &= Z_{67}^{N,\gamma}(0) + N^{-\max(\alpha_6, \alpha_7)} \left[ R_7^t(N^{\gamma+\rho_7} \kappa_7 Z_3^{N,\gamma}) + R_{12}^t(N^{\gamma+\rho_{12}} \kappa_{12} Z_9^{N,\gamma}) \right. \\ &\quad \left. - R_{10}^t(N^{\gamma+\rho_{10}} \kappa_{10} Z_6^{N,\gamma} Z_8^{N,\gamma}) - R_{17}^t(N^{\gamma+\rho_{17}} \kappa_{17} Z_6^{N,\gamma}) \right], \\ Z_{237}^{N,\gamma}(t) &= Z_{237}^{N,\gamma}(0) + N^{-\max(\alpha_2, \alpha_3, \alpha_7)} \left[ R_4^t(N^{\gamma+\rho_4} \kappa_4 Z_1^{N,\gamma}) - R_{15}^t(N^{\gamma+\rho_{15}} \kappa_{15} Z_4^{N,\gamma} Z_7^{N,\gamma}) \right], \\ Z_{679}^{N,\gamma}(t) &= Z_{679}^{N,\gamma}(0) + N^{-\max(\alpha_6, \alpha_7, \alpha_9)} \left[ R_7^t(N^{\gamma+\rho_7} \kappa_7 Z_3^{N,\gamma}) - R_{17}^t(N^{\gamma+\rho_{17}} \kappa_{17} Z_6^{N,\gamma}) \right]. \end{aligned}$$

To show convergence of  $Z_2^{N,2}$  and  $Z_3^{N,2}$  as  $N \rightarrow \infty$  in Section 5.1, we use an equation for  $(\kappa_2 Z_2^{N,2}(t) - \kappa_3 Z_3^{N,2}(t))^2$ . Define

$$\mathcal{D}^{N,\gamma}(t) \equiv \frac{\kappa_2 N^{\alpha_2} Z_2^{N,\gamma}(t) - \kappa_3 N^{\alpha_3} Z_3^{N,\gamma}(t)}{N^{\max(\alpha_2, \alpha_3)}}.$$

Using the equations for  $Z_2^{N,\gamma}$  and  $Z_3^{N,\gamma}$  given in Section 1,  $\mathcal{D}^{N,\gamma}$  satisfies

$$\begin{aligned} \mathcal{D}^{N,\gamma}(t) &= \mathcal{D}^{N,\gamma}(0) + (\kappa_2 + \kappa_3) N^{-\max(\alpha_2, \alpha_3)} \left[ R_3^t(N^{\gamma+\rho_3} \kappa_3 Z_3^{N,\gamma}) \right. \\ &\quad + R_5^t(N^{\gamma+\rho_5} \kappa_5 Z_3^{N,\gamma}) + R_6^t(N^{\gamma+\rho_6} \kappa_6 Z_3^{N,\gamma}) + R_7^t(N^{\gamma+\rho_7} \kappa_7 Z_3^{N,\gamma}) \\ &\quad \left. - R_2^t(N^{\gamma+\rho_2} \kappa_2 Z_2^{N,\gamma}) \right] + \kappa_2 N^{-\max(\alpha_2, \alpha_3)} \left[ R_4^t(N^{\gamma+\rho_4} \kappa_4 Z_1^{N,\gamma}) \right. \\ &\quad \left. + R_8^t(N^{\gamma+\rho_8} \kappa_8 Z_7^{N,\gamma}) - R_9^t(N^{\gamma+\rho_9} \kappa_9 Z_2^{N,\gamma} Z_6^{N,\gamma}) \right]. \end{aligned} \tag{1}$$

Using (1) and applying Ito's formula, we have

$$\begin{aligned}
\mathcal{D}^{N,\gamma}(t)^2 &= \mathcal{D}^{N,\gamma}(0)^2 + N^{-\max(\alpha_2, \alpha_3)} \int_0^t 2(\kappa_2 + \kappa_3) \mathcal{D}^{N,\gamma}(s-) \\
&\quad \times \left[ dR_3^s(N^{\gamma+\rho_3} \kappa_3 Z_3^{N,\gamma}) + dR_5^s(N^{\gamma+\rho_5} \kappa_5 Z_3^{N,\gamma}) + dR_6^s(N^{\gamma+\rho_6} \kappa_6 Z_3^{N,\gamma}) \right. \\
&\quad \left. + dR_7^s(N^{\gamma+\rho_7} \kappa_7 Z_3^{N,\gamma}) - dR_2^s(N^{\gamma+\rho_2} \kappa_2 Z_2^{N,\gamma}) \right] \\
&\quad + N^{-\max(\alpha_2, \alpha_3)} \int_0^t 2\kappa_2 \mathcal{D}^{N,\gamma}(s-) \left[ dR_4^s(N^{\gamma+\rho_4} \kappa_4 Z_1^{N,\gamma}) \right. \\
&\quad \left. + dR_8^s(N^{\gamma+\rho_8} \kappa_8 Z_7^{N,\gamma}) - dR_9^s(N^{\gamma+\rho_9} \kappa_9 Z_2^{N,\gamma} Z_6^{N,\gamma}) \right] \\
&\quad + (\kappa_2 + \kappa_3)^2 N^{-2\max(\alpha_2, \alpha_3)} \left[ R_3^t(N^{\gamma+\rho_3} \kappa_3 Z_3^{N,\gamma}) + R_5^t(N^{\gamma+\rho_5} \kappa_5 Z_3^{N,\gamma}) \right. \\
&\quad \left. + R_6^t(N^{\gamma+\rho_6} \kappa_6 Z_3^{N,\gamma}) + R_7^t(N^{\gamma+\rho_7} \kappa_7 Z_3^{N,\gamma}) + R_2^t(N^{\gamma+\rho_2} \kappa_2 Z_2^{N,\gamma}) \right] \\
&\quad + \kappa_2^2 N^{-2\max(\alpha_2, \alpha_3)} \left[ R_4^t(N^{\gamma+\rho_4} \kappa_4 Z_1^{N,\gamma}) + R_8^t(N^{\gamma+\rho_8} \kappa_8 Z_7^{N,\gamma}) \right. \\
&\quad \left. + R_9^t(N^{\gamma+\rho_9} \kappa_9 Z_2^{N,\gamma} Z_6^{N,\gamma}) \right].
\end{aligned} \tag{2}$$

### 3 Scaling exponents and rate constants

Recall that the normalized rate constants are defined as

$$\kappa_k = \frac{\kappa'_k}{N_0^{\beta_k}}$$

where  $N_0 = 100$  in this paper. In Table 2 and 3, unscaled and scaled rate constants are given with the corresponding scaling exponents.

Table 2: The unscaled stochastic reaction rate constants

| Rates       |                       | Rates          |                       | Rates          |                        |
|-------------|-----------------------|----------------|-----------------------|----------------|------------------------|
| $\kappa'_1$ | $4.00 \times 10^0$    | $\kappa'_7$    | $4.88 \times 10^{-3}$ | $\kappa'_{10}$ | $3.62 \times 10^{-4}$  |
| $\kappa'_2$ | $7.00 \times 10^{-1}$ | $\kappa'_8$    | $4.40 \times 10^{-4}$ | $\kappa'_{11}$ | $9.99 \times 10^{-5}$  |
| $\kappa'_3$ | $1.30 \times 10^{-1}$ | $\kappa'_9$    | $3.62 \times 10^{-4}$ | $\kappa'_{12}$ | $4.40 \times 10^{-5}$  |
| $\kappa'_4$ | $7.00 \times 10^{-3}$ | $\kappa'_{10}$ | $3.62 \times 10^{-4}$ | $\kappa'_{13}$ | $1.40 \times 10^{-5}$  |
| $\kappa'_5$ | $6.30 \times 10^{-3}$ | $\kappa'_{11}$ | $9.99 \times 10^{-5}$ | $\kappa'_{14}$ | $1.40 \times 10^{-6}$  |
| $\kappa'_6$ | $4.88 \times 10^{-3}$ | $\kappa'_{12}$ | $4.40 \times 10^{-5}$ | $\kappa'_{15}$ | $1.42 \times 10^{-6}$  |
| $\kappa'_7$ | $4.88 \times 10^{-3}$ | $\kappa'_{13}$ | $1.40 \times 10^{-5}$ | $\kappa'_{16}$ | $1.80 \times 10^{-8}$  |
| $\kappa'_8$ | $4.40 \times 10^{-4}$ | $\kappa'_{15}$ | $1.42 \times 10^{-6}$ | $\kappa'_{17}$ | $6.40 \times 10^{-10}$ |
| $\kappa'_9$ | $3.62 \times 10^{-4}$ | $\kappa'_{16}$ | $1.80 \times 10^{-8}$ | $\kappa'_{18}$ | $7.40 \times 10^{-11}$ |

Table 3: The scaled stochastic reaction rate constants with scaling exponents

| Scaled     | rates | $\beta_k$ |    | Scaled        | rates | $\beta_k$      |    | Scaled        | rates      | $\beta_k$      |    |
|------------|-------|-----------|----|---------------|-------|----------------|----|---------------|------------|----------------|----|
| $\kappa_1$ | 4     | $\beta_1$ | 0  | $\kappa_7$    | 0.488 | $\beta_7$      | -1 | $\kappa_{13}$ | 0.14       | $\beta_{13}$   | -2 |
| $\kappa_2$ | 0.7   | $\beta_2$ | 0  | $\kappa_8$    | 4.4   | $\beta_8$      | -2 | $\kappa_{14}$ | 0.014      | $\beta_{14}$   | -2 |
| $\kappa_3$ | 0.13  | $\beta_3$ | 0  | $\kappa_9$    | 3.62  | $\beta_9^*$    | -2 | $\kappa_{15}$ | 1.42       | $\beta_{15}^*$ | -3 |
| $\kappa_4$ | 0.7   | $\beta_4$ | -1 | $\kappa_{10}$ | 3.62  | $\beta_{10}^*$ | -2 | $\kappa_{16}$ | 0.00018    | $\beta_{16}$   | -2 |
| $\kappa_5$ | 0.63  | $\beta_5$ | -1 | $\kappa_{11}$ | 0.999 | $\beta_{11}$   | -2 | $\kappa_{17}$ | 0.0000064  | $\beta_{17}$   | -2 |
| $\kappa_6$ | 0.488 | $\beta_6$ | -1 | $\kappa_{12}$ | 0.44  | $\beta_{12}$   | -2 | $\kappa_{18}$ | 0.00000074 | $\beta_{18}$   | -2 |

In Table 4, three sets of  $\alpha_i$ 's and  $\rho_k$ 's we use in this model are given.

Table 4: Scaling exponents

| $\alpha_i$         | First scaling | Second scaling | Third scaling | $\rho_k$ | First scaling | Second scaling | Third scaling | $\rho_k$    | First scaling | Second scaling | Third scaling |
|--------------------|---------------|----------------|---------------|----------|---------------|----------------|---------------|-------------|---------------|----------------|---------------|
| $\alpha_1^\dagger$ | 1             | 0              | 0             | $\rho_1$ | 0             | 0              | 0             | $\rho_{10}$ | -2            | -1             | 0             |
| $\alpha_2^\dagger$ | 0             | 0              | 1             | $\rho_2$ | 0             | 0              | 1             | $\rho_{11}$ | -2            | -1             | 0             |
| $\alpha_3^\dagger$ | 0             | 0              | 1             | $\rho_3$ | 0             | 0              | 1             | $\rho_{12}$ | -2            | -1             | 0             |
| $\alpha_4$         | 2             | 2              | 2             | $\rho_4$ | 0             | -1             | -1            | $\rho_{13}$ | -2            | -2             | -2            |
| $\alpha_5$         | 2             | 2              | 2             | $\rho_5$ | -1            | -1             | 0             | $\rho_{14}$ | -1            | -2             | -2            |
| $\alpha_6$         | 0             | 0              | 0             | $\rho_6$ | -1            | -1             | 0             | $\rho_{15}$ | -1            | -1             | -1            |
| $\alpha_7$         | 0             | 0              | 0             | $\rho_7$ | -1            | -1             | 0             | $\rho_{16}$ | 0             | 0              | 0             |
| $\alpha_8^\dagger$ | 0             | 1              | 2             | $\rho_8$ | -2            | -2             | -2            | $\rho_{17}$ | -2            | -2             | -2            |
| $\alpha_9^\dagger$ | 0             | 1              | 2             | $\rho_9$ | -2            | -2             | -1            | $\rho_{18}$ | 0             | 0              | 0             |

The initial species numbers of the parametrized family by  $N$  are given as

$$X_i^N(0) \equiv \left[ \left( \frac{N}{N_0} \right)^{\alpha_i} X_i(0) \right]$$

and the normalized initial species numbers are given as

$$Z_i^{N,\gamma}(0) \equiv \frac{1}{N^{\alpha_i}} \left[ \left( \frac{N}{N_0} \right)^{\alpha_i} X_i(0) \right].$$

so that  $Z_i^{N,\gamma}(0) \rightarrow \frac{1}{N_0^{\alpha_i}} X_i(0) \equiv Z_i^\gamma(0)$  as  $N \rightarrow \infty$ . In Table 5, the initial species numbers,  $X_i(0)$ , obtained from [1] and limits of the normalized initial species numbers,  $Z_i^\gamma(0)$ , in the three time scales are given.

<sup>1</sup>\* are scaling exponents for bimolecular reaction rate constants.  
<sup>2</sup> $\alpha_i$ 's depending on  $\gamma$  is marked by  $\dagger$ .

Table 5: Initial values used in the simulation

|       | Initial values | $\gamma = 0$ | $\gamma = 1$ | $\gamma = 2$ |
|-------|----------------|--------------|--------------|--------------|
| $S_1$ | 10             | 0.1          | 10           | 10           |
| $S_2$ | 1              | 1            | 1            | 0.01         |
| $S_3$ | 1              | 1            | 1            | 0.01         |
| $S_4$ | 93             | 0.0093       | 0.0093       | 0.0093       |
| $S_5$ | 172            | 0.0172       | 0.0172       | 0.0172       |
| $S_6$ | 54             | 54           | 54           | 54           |
| $S_7$ | 7              | 7            | 7            | 7            |
| $S_8$ | 50             | 50           | 0.5          | 0.005        |
| $S_9$ | 0              | 0            | 0            | 0            |

For the  $\alpha_i$ 's and  $\rho_k$ 's determining the three scalings given in Table 4, we check the balance equations given in Table 4 in the main paper. If the balance equation fails, the corresponding time-scale constraint is computed. We have

Table 6: Balance conditions used in the model

|       | First scaling   | Second scaling  | Third scaling |                   | First scaling   | Second scaling  | Third scaling   |
|-------|-----------------|-----------------|---------------|-------------------|-----------------|-----------------|-----------------|
| $S_1$ | $\gamma \leq 2$ | balanced        | balanced      | $S_2 + S_3 + S_7$ | $\gamma \leq 0$ | balanced        | balanced        |
| $S_2$ | balanced        | balanced        | balanced      | $S_2 + S_3$       | $\gamma \leq 0$ | $\gamma \leq 1$ | balanced        |
| $S_3$ | balanced        | balanced        | balanced      | $S_2 + S_7$       | balanced        | balanced        | balanced        |
| $S_4$ | $\gamma \leq 2$ | $\gamma \leq 2$ | balanced      | $S_6 + S_7 + S_9$ | $\gamma \leq 1$ | $\gamma \leq 2$ | $\gamma \leq 2$ |
| $S_5$ | $\gamma \leq 2$ | $\gamma \leq 2$ | balanced      | $S_6 + S_7$       | $\gamma \leq 1$ | balanced        | balanced        |
| $S_6$ | $\gamma \leq 1$ | balanced        | balanced      | $S_6 + S_9$       | $\gamma \leq 1$ | $\gamma \leq 2$ | $\gamma \leq 2$ |
| $S_7$ | $\gamma \leq 1$ | $\gamma \leq 1$ | balanced      | $S_8 + S_9$       | $\gamma \leq 0$ | $\gamma \leq 1$ | balanced        |
| $S_8$ | $\gamma \leq 0$ | $\gamma \leq 1$ | balanced      |                   |                 |                 |                 |
| $S_9$ | balanced        | balanced        | balanced      |                   |                 |                 |                 |

#### 4 Solution of balance conditions computed using Maple

To select values for scaling exponents based on the balance equations, we solve the balance equations with some conditions for monotonicity using *Maple*. The following gives the results we obtain from *Maple*.

*restart* :

*with(simplex)*

$$\text{BalanceEquations} := \left\{ \beta_{13} = \alpha_1 + \beta_{14}, \right.$$

$$\begin{aligned}
& \max(\alpha_3 + \beta_3, \alpha_1 + \beta_4, \alpha_3 + \beta_5, \alpha_3 + \beta_6, \alpha_3 + \beta_7, \alpha_7 + \beta_8) \\
& = \max(\alpha_2 + \beta_2, \alpha_2 + \alpha_6 + \beta_9), \\
& \alpha_2 + \beta_2 = \max(\alpha_3 + \beta_3, \alpha_3 + \beta_5, \alpha_3 + \beta_6, \alpha_3 + \beta_7), \\
& \alpha_3 + \beta_6 = \alpha_4 + \beta_{18}, \alpha_3 + \beta_5 = \alpha_5 + \beta_{16}, \\
& \max(\alpha_3 + \beta_7, \alpha_7 + \beta_8, \alpha_9 + \beta_{12}, \alpha_4 + \alpha_7 + \beta_{15}) \\
& = \max(\alpha_2 + \alpha_6 + \beta_9, \alpha_6 + \alpha_8 + \beta_{10}, \alpha_6 + \beta_{17}), \\
& \alpha_2 + \alpha_6 + \beta_9 = \max(\alpha_7 + \beta_8, \alpha_4 + \alpha_7 + \beta_{15}), \\
& \max(\beta_1, \alpha_9 + \beta_{12}) = \max(\alpha_6 + \alpha_8 + \beta_{10}, \alpha_8 + \beta_{11}), \\
& \alpha_6 + \alpha_8 + \beta_{10} = \alpha_9 + \beta_{12}, \alpha_1 + \beta_4 = \alpha_4 + \alpha_7 + \beta_{15}, \\
& \max(\alpha_1 + \beta_4, \alpha_7 + \beta_8) = \alpha_2 + \alpha_6 + \beta_9, \\
& \max(\alpha_3 + \beta_3, \alpha_1 + \beta_4, \alpha_3 + \beta_5, \alpha_3 + \beta_6, \alpha_3 + \beta_7) \\
& = \max(\alpha_2 + \beta_2, \alpha_4 + \alpha_7 + \beta_{15}), \alpha_3 + \beta_7 = \alpha_6 + \beta_{17}, \\
& \max(\alpha_3 + \beta_7, \alpha_7 + \beta_8, \alpha_4 + \alpha_7 + \beta_{15}) \\
& = \max(\alpha_2 + \alpha_6 + \beta_9, \alpha_6 + \beta_{17}), \\
& \max(\alpha_3 + \beta_7, \alpha_9 + \beta_{12}) = \max(\alpha_6 + \alpha_8 + \beta_{10}, \alpha_6 + \beta_{17}), \\
& \left. \beta_1 = \alpha_8 + \beta_{11} \right\}
\end{aligned}$$

$$\begin{aligned}
\text{Conditions} := & \left\{ \beta_1 - \beta_{13} \geq 0, \beta_9 - \beta_{10} \geq 0, \beta_{10} - \beta_{15} \geq 0, \beta_2 - \beta_3 \geq 0, \right. \\
& \beta_3 - \beta_4 \geq 0, \beta_4 - \beta_5 \geq 0, \beta_5 - \beta_6 \geq 0, \beta_6 - \beta_7 \geq 0, \\
& \beta_7 - \beta_8 \geq 0, \beta_8 - \beta_{11} \geq 0, \beta_{11} - \beta_{12} \geq 0, \beta_{12} - \beta_{14} \geq 0, \\
& \left. \beta_{14} - \beta_{16} \geq 0, \beta_{16} - \beta_{17} \geq 0, \beta_{17} - \beta_{18} \geq 0 \right\}
\end{aligned}$$

*Outputs := solve(BalanceEquations, useassumptions) assuming Conditions*

$$\begin{aligned}
& \left\{ \alpha_1 = -\beta_4 + \alpha_4 + \alpha_7 + \beta_{15}, \alpha_2 = -\alpha_6 - \beta_9 + \max(\alpha_7 + \beta_8, \alpha_4 + \alpha_7 + \beta_{15}), \right. \\
& \alpha_3 = \alpha_3, \alpha_4 = \alpha_4, \alpha_5 = \alpha_3 + \beta_5 - \beta_{16}, \alpha_6 = \alpha_6, \alpha_7 = \alpha_7, \alpha_8 = \alpha_8, \\
& \alpha_9 = \alpha_6 + \alpha_8 + \beta_{10} - \beta_{12}, \beta_1 = \alpha_8 + \beta_{11}, \\
& \beta_2 = \alpha_6 + \beta_9 - \max(\alpha_7 + \beta_8, \alpha_4 + \alpha_7 + \beta_{15}) + \alpha_3 + \beta_3, \\
& \beta_3 = \beta_3, \beta_4 = \beta_4, \beta_5 = \beta_5, \beta_6 = -\alpha_3 + \alpha_4 + \beta_{18}, \beta_7 = -\alpha_3 + \alpha_6 + \beta_{17}, \\
& \left. \beta_8 = \beta_8, \beta_9 = \beta_9, \beta_{10} = \beta_{10}, \beta_{11} = \beta_{11}, \beta_{12} = \beta_{12}, \right.
\end{aligned}$$

$$\left. \begin{aligned} \beta_{13} &= -\beta_4 + \alpha_4 + \alpha_7 + \beta_{15} + \beta_{14}, \beta_{14} = \beta_{14}, \beta_{15} = \beta_{15}, \beta_{16} = \beta_{16}, \\ \beta_{17} &= \beta_{17}, \beta_{18} = \beta_{18} \end{aligned} \right\}$$

## 5 The proof of Theorem 1

To prove the convergence for  $\gamma = 0$  and  $\gamma = 1$ , we apply Theorem 4.1 in [2]. Following from Theorem 4.1 (and Remark 4.2) in [2],  $Z^{N,\gamma} \Rightarrow Z^\gamma$  in the first time scale on  $[0, \tau_\infty)$  where

$$\tau_\infty = \lim_{c \rightarrow \infty} \tau_c \equiv \inf \left\{ t : \sup_{s \leq t} Z^\gamma(s) \geq c \right\}.$$

The theorem is directly applicable for  $\gamma = 0$ , since the first time scale of interest in this model is when  $\gamma = 0$ .

For  $\gamma = 1$ , we define a stopping time

$$\tau_{N,c}^1 = \inf \left\{ t : \sup_{s \leq t} Z^{N,1}(s) \geq c \right\},$$

so that  $Z^{N,1}(t)$  is bounded for  $t \leq \tau_{N,c}^1$ . We compare a scaling exponent for each species number to those for all rates of reactions involving the species. Then,  $\alpha_i$  is less or equal to  $\gamma + \rho_k$  for each  $k \in \Gamma_i^+ \cup \Gamma_i^-$  for all species except for Species 2 and 3, i.e., the only species possibly not bounded in this time scale are  $S_2$  and  $S_3$ . On the other hand,  $Z_2^{N,1}(t), Z_3^{N,1}(t) \leq Z_{23}^{N,1}(t) \leq c$  on  $[0, \tau_{N,c}^1)$ . Therefore, relative compactness of  $\{Z^{N,1}(\cdot \wedge \tau_{N,c}^1)\}$  is satisfied, since all propensities  $\hat{\lambda}_k(Z^{N,1}(\cdot \wedge \tau_{N,c}^1))$  are uniformly bounded. Then,  $(Z^{N,1}(\cdot \wedge \tau_{N,c}^1), \tau_{N,c}^1) \Rightarrow (Z^1(\cdot \wedge \tau_c^1), \tau_c^1)$  for all but countably many  $c$  and we can set  $\tau_\infty^1 = \lim_{c \rightarrow \infty} \tau_c^1$ .

### 5.1 The proof of the convergence for $\gamma = 2$

*Proof.* Computing natural time scales of the species, we get  $\gamma_2 = \gamma_3 = \gamma_6 = 0$ ,  $\gamma_7 = 1$ , and  $\gamma_1 = \gamma_4 = \gamma_5 = \gamma_8 = \gamma_9 = 2$ . Since we already get the limiting models for  $S_2, S_3, S_{23}, S_6, S_7$ , and  $S_8$  in the previous time scales, we set  $\gamma = 2$  and derive a limiting model for a subset of species we are interested in. For  $\gamma = 2$ ,  $Z_1^{N,2}, Z_4^{N,2}, Z_5^{N,2}, Z_8^{N,2}$ , and  $Z_9^{N,2}$  are of order 1, and averaged behavior of  $Z_2^{N,2}, Z_3^{N,2}, Z_6^{N,2}$ , and  $Z_7^{N,2}$  is expressed in terms of the limits of the scaled species numbers of order 1 in this time scale. In the section of limiting models in three time scales in the main text, we already derived limiting equations for  $Z_{23}^2, Z_8^2$ , and  $Z_9^2$ .

Define

$$\mathcal{D}^{N,2}(t) \equiv \kappa_2 Z_2^{N,2}(t) - \kappa_3 Z_3^{N,2}(t).$$

First, we will prove that the scaled species numbers for fast fluctuating species,  $S_2$  and  $S_3$ , actually converge to a limit in a finite time interval. That is, for any fixed  $\epsilon > 0$  and for any  $t$  such that  $\epsilon < t \leq \tau_\infty^2$ ,

$$Z_2^{N,2}(t) \longrightarrow \bar{Z}_2^2(t) = \frac{\kappa_3}{\kappa_2 + \kappa_3} Z_{23}^2(t), \quad (3)$$



$$Z_3^{N,2}(t) \longrightarrow \bar{Z}_3^2(t) = \frac{\kappa_2}{\kappa_2 + \kappa_3} Z_{23}^2(t), \quad (4)$$

as  $N \rightarrow \infty$  by showing  $\mathcal{D}^{N,2}(t)^2 \rightarrow 0$  for  $\epsilon < t \leq \tau_\infty^2$  and using  $Z_{23}^{N,2}(t) \rightarrow Z_{23}^2(t)$ . The scaled species numbers of  $S_2$  and  $S_3$  may not converge to  $\bar{Z}_2^2(t)$  and  $\bar{Z}_3^2(t)$  in  $t \in [0, \epsilon]$ , since  $\kappa_2 Z_2^{N,2}(0) - \kappa_3 Z_3^{N,2}(0)$  may not converge to zero. Plugging  $\alpha_i$ 's and  $\rho_k$ 's in (2), we have

$$\begin{aligned} \mathcal{D}^{N,2}(t)^2 &= \mathcal{D}^{N,2}(0)^2 + N^{-1} \int_0^t 2(\kappa_2 + \kappa_3) \mathcal{D}^{N,2}(s-) \quad (5) \\ &\times \left[ dR_3^s(N^3 \kappa_3 Z_3^{N,2}) + dR_5^s(N^2 \kappa_5 Z_3^{N,2}) + dR_6^s(N^2 \kappa_6 Z_3^{N,2}) + dR_7^s(N^2 \kappa_7 Z_3^{N,2}) - dR_2^s(N^3 \kappa_2 Z_2^{N,2}) \right] \\ &+ N^{-1} \int_0^t 2\kappa_2 \mathcal{D}^{N,2}(s-) \times \left[ dR_4^s(N \kappa_4 Z_1^{N,2}) + dR_8^s(\kappa_8 Z_7^{N,2}) - dR_9^s(N \kappa_9 Z_2^{N,2} Z_6^{N,2}) \right] \\ &+ N^{-2} (\kappa_2 + \kappa_3)^2 \left[ R_3^t(N^3 \kappa_3 Z_3^{N,2}) + R_5^t(N^2 \kappa_5 Z_3^{N,2}) + R_6^t(N^2 \kappa_6 Z_3^{N,2}) + R_7^t(N^2 \kappa_7 Z_3^{N,2}) + R_2^t(N^3 \kappa_2 Z_2^{N,2}) \right] \\ &+ N^{-2} \kappa_2^2 \left[ R_4^t(N \kappa_4 Z_1^{N,2}) + R_8^t(\kappa_8 Z_7^{N,2}) + R_9^t(N \kappa_9 Z_2^{N,2} Z_6^{N,2}) \right]. \end{aligned}$$

Define reaction terms centered by their propensities as

$$\tilde{R}_k^t(N^{\gamma+\rho_k} \hat{\lambda}_k(Z^{N,\gamma})) = R_k^t(N^{\gamma+\rho_k} \hat{\lambda}_k(Z^{N,\gamma})) - \int_0^t N^{\gamma+\rho_k} \hat{\lambda}_k(Z^{N,\gamma}(s)) ds.$$

Centering propensity in each reaction term in (5), we get

$$\mathcal{D}^{N,2}(t)^2 = \mathcal{D}^{N,2}(0)^2 + \mathcal{M}^N(t) + \int_0^t [-2N^2(\kappa_2 + \kappa_3) \mathcal{D}^{N,2}(s)^2 + N \mathcal{E}^N(s)] ds, \quad (6)$$

where

$$\begin{aligned} \mathcal{E}^N(t) &\equiv 2(\kappa_2 + \kappa_3)(\kappa_5 + \kappa_6 + \kappa_7) \mathcal{D}^{N,2}(t-) Z_3^{N,2}(t) \\ &+ 2N^{-1} \kappa_2 \mathcal{D}^{N,2}(t-) \left[ \kappa_4 Z_1^{N,2}(t) + N^{-1} \kappa_8 Z_7^{N,2}(t) - \kappa_9 Z_2^{N,2}(t) Z_6^{N,2}(t) \right] \\ &+ (\kappa_2 + \kappa_3)^2 \left[ \kappa_3 Z_3^{N,2}(t) + N^{-1} (\kappa_5 + \kappa_6 + \kappa_7) Z_3^{N,2}(t) + \kappa_2 Z_2^{N,2}(t) \right] \\ &+ N^{-2} \kappa_2^2 \left[ \kappa_4 Z_1^{N,2}(t) + N^{-1} \kappa_8 Z_7^{N,2}(t) + \kappa_9 Z_2^{N,2}(t) Z_6^{N,2}(t) \right], \end{aligned}$$

and

$$\begin{aligned} \mathcal{M}^N(t) &\equiv N^{-1} \int_0^t 2(\kappa_2 + \kappa_3) \mathcal{D}^{N,2}(s-) \\ &\times \left[ d\tilde{R}_3^s(N^3 \kappa_3 Z_3^{N,2}) + d\tilde{R}_5^s(N^2 \kappa_5 Z_3^{N,2}) + d\tilde{R}_6^s(N^2 \kappa_6 Z_3^{N,2}) + d\tilde{R}_7^s(N^2 \kappa_7 Z_3^{N,2}) - d\tilde{R}_2^s(N^3 \kappa_2 Z_2^{N,2}) \right] \\ &+ N^{-1} \int_0^t 2\kappa_2 \mathcal{D}^{N,2}(s-) \times \left[ d\tilde{R}_4^s(N \kappa_4 Z_1^{N,2}) + d\tilde{R}_8^s(\kappa_8 Z_7^{N,2}) - d\tilde{R}_9^s(N \kappa_9 Z_2^{N,2} Z_6^{N,2}) \right] \\ &+ N^{-2} (\kappa_2 + \kappa_3)^2 \left[ \tilde{R}_3^t(N^3 \kappa_3 Z_3^{N,2}) + \tilde{R}_5^t(N^2 \kappa_5 Z_3^{N,2}) + \tilde{R}_6^t(N^2 \kappa_6 Z_3^{N,2}) + \tilde{R}_7^t(N^2 \kappa_7 Z_3^{N,2}) + \tilde{R}_2^t(N^3 \kappa_2 Z_2^{N,2}) \right] \\ &+ N^{-2} \kappa_2^2 \left[ \tilde{R}_4^t(N \kappa_4 Z_1^{N,2}) + \tilde{R}_8^t(\kappa_8 Z_7^{N,2}) + \tilde{R}_9^t(N \kappa_9 Z_2^{N,2} Z_6^{N,2}) \right]. \end{aligned}$$

In (6),  $[-2N^2(\kappa_2 + \kappa_3)(\mathcal{D}^{N,2})^2 + N\mathcal{E}^N]$  is a drift and  $\mathcal{M}^N$  gives noise of  $(\mathcal{D}^{N,2})^2$  around its mean satisfying

$$E[\mathcal{M}^N(t)] = 0. \quad (7)$$

Taking an expectation in (6) and using (7), we get

$$E[\mathcal{D}^{N,2}(t)^2] = E[\mathcal{D}^{N,2}(0)^2] - \int_0^t 2N^2(\kappa_2 + \kappa_3)E[\mathcal{D}^{N,2}(s)^2] ds + \int_0^t NE[\mathcal{E}^N(s)] ds. \quad (8)$$

By Gronwall's inequality, we get

$$E[\mathcal{D}^{N,2}(t)^2] \leq \left( E[\mathcal{D}^{N,2}(0)^2] + \int_0^t NE[\mathcal{E}^N(s)] ds \right) e^{-2N^2(\kappa_2 + \kappa_3)t}. \quad (9)$$

Now, we will get an upper bound for the second moment of reaction terms. Let  $X(\cdot)$  be a centered Poisson process with mean zero and  $\tau$  be a stopping time for the process  $\{X(t); t \geq 0\}$ . Theorem 7 in [3] says that for  $n \geq 2$ , there exist constant  $C$  (finite and positive) depending on  $n$  such that

$$E[|X(\tau)|^n] \leq C \max\{E[\tau], E[\tau^{n/2}]\}. \quad (10)$$

Setting  $\tau = \int_0^t N^{\gamma+\rho_k} \hat{\lambda}_k(Z^{N,\gamma}(s)) ds$  and  $X(\tau) = \tilde{R}_k^t(N^{\gamma+\rho_k} \hat{\lambda}_k(Z^{N,\gamma}))$ , we have  $E[X(\tau)] = 0$  and Theorem 7 is applicable. Using Cauchy-Schwarz inequality, we get

$$\begin{aligned} E[R_k^t(N^{\gamma+\rho_k} \hat{\lambda}_k(Z^{N,\gamma}))^2] &= E \left[ \left( \tilde{R}_k^t(N^{\gamma+\rho_k} \hat{\lambda}_k(Z^{N,\gamma})) + \int_0^t N^{\gamma+\rho_k} \hat{\lambda}_k(Z^{N,\gamma}(s)) ds \right)^2 \right] \\ &\leq 2E \left[ \tilde{R}_k^t(N^{\gamma+\rho_k} \hat{\lambda}_k(Z^{N,\gamma}))^2 \right] + 2E \left[ \left( \int_0^t N^{\gamma+\rho_k} \hat{\lambda}_k(Z^{N,\gamma}(s)) ds \right)^2 \right]. \end{aligned} \quad (11)$$

Then, applying (10) to (11) and using Holder's inequality, we get an upper bound for the second moment of the random process.

$$\begin{aligned} &E \left[ R_k^t(N^{\gamma+\rho_k} \hat{\lambda}_k(Z^{N,\gamma}))^2 \right] \\ &\leq 2C_1 E \left[ \int_0^t N^{\gamma+\rho_k} \hat{\lambda}_k(Z^{N,\gamma}(s)) ds \right] + 2E \left[ \left( \int_0^t N^{\gamma+\rho_k} \hat{\lambda}_k(Z^{N,\gamma}(s)) ds \right)^2 \right] \\ &\leq 2C_1 \int_0^t E \left[ N^{\gamma+\rho_k} \hat{\lambda}_k(Z^{N,\gamma}(s)) \right] ds + 2t \int_0^t E \left[ N^{2(\gamma+\rho_k)} \hat{\lambda}_k(Z^{N,\gamma}(s))^2 \right] ds \end{aligned} \quad (12)$$

Next, we will show  $\sup_{t \leq \tau_\infty^2} \int_0^t E[\mathcal{E}^N(s)] ds < O(N)$  using boundedness of moments of reaction terms. Since  $\mathcal{D}^{N,2}(t)^2 \leq (\kappa_2 + \kappa_3)Z_{237}^{N,2}(t)^2$ , using the equation for  $Z_{237}^{N,2}(t)$  from the one in Section 2 and (12), we get

$$E[Z_{237}^{N,2}(t)^2] \leq 2E[Z_{237}^{N,2}(0)^2] + 2E \left[ \left( N^{-1} R_4^t(N\kappa_4 Z_1^{N,2}) \right)^2 \right]$$

$$\leq 2E[Z_{237}^{N,2}(0)^2] + 4C_1 \int_0^t N^{-1} \kappa_4 E[Z_1^{N,2}(s)] ds + 4t \int_0^t \kappa_4^2 E[Z_1^{N,2}(s)^2] ds.$$

Using the equation for  $Z_1^{N,2}(t)$  and (12), we get

$$\begin{aligned} E[Z_1^{N,2}(t)^2] &\leq 2E[Z_1^{N,2}(0)^2] + 2E[R_{13}(\kappa_{13})^2] \\ &\leq 2E[Z_1^{N,2}(0)^2] + 4C_1 \kappa_{13} t + 4\kappa_{13}^2 t^2. \end{aligned}$$

Therefore,

$$\sup_N \sup_{t \leq \tau_\infty^2} E[Z_1^{N,2}(t)^2] < \infty. \quad (13)$$

and this gives

$$\sup_N \sup_{t \leq \tau_\infty^2} E[Z_{237}^{N,2}(t)^2] < \infty. \quad (14)$$

Using (14) and (8), we obtain

$$\sup_{t \leq \tau_\infty^2} \int_0^t E[\mathcal{E}^N(s)] ds < O(N),$$

and this and (9) imply that for any  $\epsilon > 0$  independent of  $N$  and for  $\tau_\infty^2 > \epsilon > 0$ ,

$$\begin{aligned} \sup_{\epsilon < t \leq \tau_\infty^2} E[\mathcal{D}^{N,2}(t)^2] &\leq \sup_{\epsilon < t \leq \tau_\infty^2} \left( E[\mathcal{D}^{N,2}(0)^2] + \int_0^t NE[\mathcal{E}^N(s)] ds \right) e^{-2N^2(\kappa_2 + \kappa_3)t} \\ &\longrightarrow 0, \end{aligned}$$

as  $N \rightarrow \infty$ .

Next, we will derive limiting equations for  $Z_1^2$ ,  $Z_4^2$ , and  $Z_5^2$ . Using the equation for  $Z_1^{N,\gamma}$  in Section 1, we get the equation for  $Z_1^{N,2}$  as

$$Z_1^{N,2}(t) = Z_1^{N,2}(0) + R_{13}^t(\kappa_{13}) - R_{14}^t(\kappa_{14} Z_1^{N,2}).$$

Letting  $N \rightarrow \infty$ , we get

$$Z_1^2(t) = Z_1^2(0) + R_{13}^t(\kappa_{13}) - R_{14}^t(\kappa_{14} Z_1^2).$$

Since  $Z_1^{N,2}(0) = Z_1^2(0) = X_1(0)$  due to  $\alpha_1 = 0$ , we actually have  $Z_1^{N,2}(t) = Z_1^2(t)$ . The equations for  $Z_4^{N,2}$  and  $Z_5^{N,2}$  are given from Section 1 as

$$\begin{aligned} Z_4^{N,2}(t) &= Z_4^{N,2}(0) + N^{-2} \left[ R_6^t(N^2 \kappa_6 Z_3^{N,2}) - R_{18}^t(N^2 \kappa_{18} Z_4^{N,2}) \right], \\ Z_5^{N,2}(t) &= Z_5^{N,2}(0) + N^{-2} \left[ R_5^t(N^2 \kappa_5 Z_3^{N,2}) - R_{16}^t(N^2 \kappa_{16} Z_5^{N,2}) \right]. \end{aligned}$$

Using the law of large numbers for Poisson processes and using (4), we get

$$\begin{aligned} Z_4^2(t) &= Z_4^2(0) + \int_0^t (\kappa_6 \bar{Z}_3^2(s) - \kappa_{18} Z_4^2(s)) ds, \\ Z_5^2(t) &= Z_5^2(0) + \int_0^t (\kappa_5 \bar{Z}_3^2(s) - \kappa_{16} Z_5^2(s)) ds. \end{aligned}$$

Now, we will show that  $\int_0^t Z_2^{N,2}(s) Z_6^{N,2}(s) ds$ ,  $\int_0^t Z_6^{N,2}(s) ds$ ,  $\int_0^t Z_4^{N,2}(s) Z_7^{N,2}(s) ds$ , and  $\int_0^t Z_7^{N,2}(s) ds$  are stochastically bounded in a finite time interval. First, we show that  $\int_0^t E[Z_6^{N,2}(s) Z_8^{N,2}(s)] ds$  and  $\int_0^t E[Z_4^{N,2}(s) Z_7^{N,2}(s)] ds$  are bounded for  $t \leq \tau_\infty^2$ . From the equation for  $Z_{679}^{N,2}(t)$ , we have

$$E[Z_{679}^{N,2}(t)] \leq E[Z_{679}^{N,2}(0)] + \int_0^t \kappa_7 E[Z_3^{N,2}(s)] ds.$$

Since  $\sup_{t \leq \tau_\infty^2} E[Z_3^{N,2}(t)]$  is uniformly bounded due to (14), we get

$$\sup_N \sup_{t \leq \tau_\infty^2} E[Z_{679}^{N,2}(t)] < \infty. \quad (15)$$

Using  $N^{-2} E[Z_{67}^{N,2}(t)] \leq E[Z_{679}^{N,2}(t)]$ , we also get

$$\sup_N \sup_{t \leq \tau_\infty^2} N^{-2} E[Z_{67}^{N,2}(t)] < \infty.$$

From the equation for  $N^{-2} Z_{67}^{N,2}(t)$ , we have

$$N^{-2} E[Z_{67}^{N,2}(t)] \leq N^{-2} E[Z_{67}^{N,2}(0)] + \int_0^t (\kappa_7 E[Z_3^{N,2}(s)] + \kappa_{12} E[Z_9^{N,2}(s)] - \kappa_{10} E[Z_6^{N,2}(s) Z_8^{N,2}(s)]) ds.$$

Using (14) and (15),  $\int_0^t \kappa_{10} E[Z_6^{N,2}(s) Z_8^{N,2}(s)] ds$  is uniformly bounded as

$$\begin{aligned} & \sup_N \sup_{t \leq \tau_\infty^2} \int_0^t \kappa_{10} E[Z_6^{N,2}(s) Z_8^{N,2}(s)] ds \\ & \leq \sup_N \sup_{t \leq \tau_\infty^2} \left\{ N^{-2} E[Z_{67}^{N,2}(0)] - N^{-2} E[Z_{67}^{N,2}(t)] + \int_0^t (\kappa_7 E[Z_3^{N,2}(s)] + \kappa_{12} E[Z_9^{N,2}(s)]) ds \right\} < \infty. \end{aligned} \quad (16)$$

Similarly from the equation for  $Z_{237}^{N,2}(t)$ , we have

$$E[Z_{237}^{N,2}(t)] \leq E[Z_{237}^{N,2}(0)] + \int_0^t (\kappa_4 E[Z_1^{N,2}(s)] - \kappa_{15} E[Z_4^{N,2}(s) Z_7^{N,2}(s)]) ds.$$

Using (13),  $\int_0^t \kappa_{15} E[Z_4^{N,2}(s) Z_7^{N,2}(s)] ds$  is uniformly bounded as

$$\begin{aligned} & \sup_N \sup_{t \leq \tau_\infty^2} \int_0^t \kappa_{15} E[Z_4^{N,2}(s) Z_7^{N,2}(s)] ds \\ & \leq \sup_N \sup_{t \leq \tau_\infty^2} \left\{ E[Z_{237}^{N,2}(0)] - E[Z_{237}^{N,2}(t)] + \int_0^t \kappa_4 E[Z_1^{N,2}(s)] ds \right\} < \infty. \end{aligned}$$

Finally, we show stochastic boundedness of  $\int_0^t Z_2^{N,2}(s)Z_6^{N,2}(s) ds$  and  $\int_0^t Z_6^{N,2}(s) ds$  for  $t \leq \tau_\infty^2$ . We split terms and obtain

$$\begin{aligned} P\left(\int_0^t \kappa_9 Z_2^{N,2}(s)Z_6^{N,2}(s) ds > k\right) &\leq P\left(\int_0^t \kappa_9 Z_6^{N,2}(s)Z_8^{N,2}(s) ds > \frac{k}{m}\right) + P\left(\sup_{t \leq \tau_\infty^2} \frac{Z_2^{N,2}(t)}{Z_8^{N,2}(t)} ds > m\right) \\ &\leq \underbrace{\frac{m}{k} E\left[\int_0^t \kappa_9 Z_6^{N,2}(s)Z_8^{N,2}(s) ds\right]}_{(I)} + \underbrace{P\left(\sup_{t \leq \tau_\infty^2} \frac{Z_2^{N,2}(t)}{Z_8^{N,2}(t)} ds > m\right)}_{(II)}. \end{aligned}$$

Using (16) and taking  $k$  large enough, we can make the term in (I) small. Since  $Z_2^{N,2}$  and  $Z_8^{N,2}$  converge to their limits as  $N \rightarrow \infty$  and since  $Z_8^{N,2}(0) \neq 0$ , we can take  $m$  large to make the term in (II) small. Therefore,  $\int_0^t Z_2^{N,2}(s)Z_6^{N,2}(s) ds$  is stochastically bounded. For  $t \in [0, \tau_\infty^2]$  we have

$$\int_0^t 1_{[r, \infty)}(Z_6^{N,2}(s)) ds \leq \int_0^t \frac{Z_6^{N,2}(s)}{r} ds, \quad (17)$$

and taking the probability in both sides of (17), for fixed  $\delta > 0$ , we get

$$\begin{aligned} P\left(\int_0^t \frac{Z_6^{N,2}(s)}{r} ds > \delta\right) &\leq P\left(\inf_{t \leq \tau_\infty^2} Z_8^{N,2}(t) \leq \eta\right) + P\left(\int_0^t Z_6^{N,2}(s)Z_8^{N,2}(s) ds > r\delta\eta\right) \\ &\leq \underbrace{P\left(\inf_{t \leq \tau_\infty^2} Z_8^{N,2}(t) \leq \eta\right)}_{(III)} + \underbrace{\frac{1}{r\delta\eta} E\left[\int_0^t Z_6^{N,2}(s)Z_8^{N,2}(s) ds\right]}_{(IV)}. \end{aligned}$$

Since  $Z_8^{N,2}(0) \neq 0$ , we can take  $\eta > 0$  small enough and  $r$  large enough to make both terms in (III) and (IV) small. Therefore,  $Z_6^{N,2}$  is stochastically bounded for  $t \in [0, \tau_\infty^2]$ . Similarly, the stochastic boundedness of  $Z_7^{N,2}$  can be shown using  $\int_0^t Z_4^{N,2}(s)Z_7^{N,2}(s) ds$  and  $\inf_{t \leq \tau_\infty^2} Z_4^{N,2}(t)$  instead of  $\int_0^t Z_6^{N,2}(s)Z_8^{N,2}(s) ds$  and  $\inf_{t \leq \tau_\infty^2} Z_8^{N,2}(t)$ . □

## 6 Sketch of the proof of Remark 3

Denote

$$\begin{aligned} V_0^N(t) &= \left(Z_{23}^{N,2}(t), Z_4^{N,2}(t), Z_5^{N,2}(t), Z_8^{N,2}(t), Z_9^{N,2}(t)\right)^T, \\ V_0(t) &= \left(Z_{23}^2(t), Z_4^2(t), Z_5^2(t), Z_8^2(t), Z_9^2(t)\right)^T. \end{aligned}$$

We already showed that  $V_0^N \Rightarrow V_0$  as  $N \rightarrow \infty$ . We want to estimate an error between  $V_0^N(t)$  and  $V_0(t)$ . Define  $U^N(t) = r_N (V_0^N(t) - V_0(t))$ . If we show  $U^N \Rightarrow U$ , the error between  $V_0^N(t)$  and  $V_0(t)$  is approximately of order  $r_{N_0}^{-1}$ .

Suppose that  $V_0^N(t)$  and  $V_0(t)$  satisfy

$$M^{N,1}(t) = V_0^N(t) - V_0^N(0) - \int_0^t F^N(V^N(s)) ds, \quad (18)$$

$$V_0(t) = V_0(0) + \int_0^t \bar{F}(V_0(s)) ds, \quad (19)$$

where  $F^N(V^N(t))$  is a drift and  $M^{N,1}(t)$  is Poisson noise which gives fluctuations of  $V_0^N$  due to the corresponding reactions.  $V_0$  is a solution of the stochastic processes whose randomness comes from  $Z_1^2$ . The drift term of  $V_0$  is obtained from the drift term of  $V_0^N$  by replacing the species numbers fluctuating very rapidly by some variables describing their averaged behavior. Since  $Z_1^2$  rarely moves during the time interval of our interest,  $V_0$  behaves almost like a deterministic process. Denote  $A_N$  as a differential operator which gives instantaneous behavior of the normalized species numbers  $Z^{N,2}$  during a very short time interval. For some function  $H_N$  which is identified later,  $A_N H_N$  gives a drift for the process  $H_N$  and denote  $M^{N,2}(t)$  as noise. Then,  $M^{N,2}(t)$  satisfies

$$M^{N,2}(t) = H_N(V^N(t)) - H_N(V^N(0)) - \int_0^t A_N H_N(V^N(s)) ds. \quad (20)$$

Adding (18) and (19) and multiplying by  $r_N$ , we get

$$r_N M^{N,1}(t) = U^N(t) - U^N(0) - r_N \int_0^t (F^N(V^N(s)) - \bar{F}(V_0(s))) ds. \quad (21)$$

Adding and subtracting terms, we rewrite (21) as

$$\begin{aligned} r_N M^{N,1}(t) &= U^N(t) - U^N(0) - r_N \int_0^t (\bar{F}(V_0^N(s)) - \bar{F}(V_0(s))) ds \\ &\quad - r_N \int_0^t (F^N(V^N(s)) - F(V^N(s))) ds \\ &\quad - r_N \int_0^t (F(V^N(s)) - \bar{F}(V_0^N(s))) ds. \end{aligned} \quad (22)$$

We identify  $H_N$  such that  $A_N H_N \approx F - \bar{F}$ , and using (20), (22) becomes

$$\begin{aligned} r_N M^{N,1}(t) &\approx U^N(t) - U^N(0) - r_N \int_0^t (\bar{F}(V_0^N(s)) - \bar{F}(V_0(s))) ds \\ &\quad - r_N \int_0^t (F^N(V^N(s)) - F(V^N(s))) ds \\ &\quad + r_N M^{N,2}(t) - r_N (H_N(V^N(t)) - H_N(V^N(0))). \end{aligned} \quad (23)$$

We can show that  $r_N \int_0^t (F^N(V^N(s)) - F(V^N(s))) ds$  and  $r_N (H_N(V^N(t)) - H_N(V^N(0)))$  converge to zero as  $N$  goes to infinity. We can show that  $r_N (M^{N,1}(t) - M^{N,2}(t)) \Rightarrow M$  for an appropriately chosen  $r_N$  where

$M$  is a process with mean-zero and independent increments satisfying

$$E [M(t)M^T(t)] = \int_0^t \bar{G}(V_0(s)) ds.$$

If  $\bar{G} = \sigma\sigma^T$ ,  $U^N \Rightarrow U$  with  $U$  satisfying

$$U(t) = U(0) + \int_0^t \nabla \bar{F}(V_0(s))U(s) ds + \int_0^t \sigma(V_0(s)) dW(s),$$

where  $W(t)$  is a standard Brownian motion. Let  $r_N = N^{1/2}$  and denote

$$U(t) = (U_{23}(t), U_4(t), U_5(t), U_8(t), U_9(t))^T.$$

In the heat shock response model of *E. coli* for  $\gamma = 2$ ,  $U^N \Rightarrow U$  where  $U$  is a solution of

$$U(t) = + \int_0^t \begin{bmatrix} 1 \\ 0 \\ 0 \\ 0 \\ 0 \end{bmatrix} \sqrt{\kappa_4 Z_1^2(s) + \kappa_9 \bar{Z}_2^2(s) \bar{Z}_6^2(s)} dW(s) \\ + \int_0^t \begin{bmatrix} -\frac{\kappa_9}{\kappa_2 + \kappa_3} \left( \kappa_3 \bar{Z}_6^2(s) + \frac{\kappa_2 \kappa_7}{\kappa_{10}} \cdot \frac{\bar{Z}_2^2(s)}{\bar{Z}_8^2(s)} \right) U_{23}(s) + \kappa_9 \frac{\bar{Z}_2^2(s) \bar{Z}_6^2(s)}{\bar{Z}_8^2(s)} U_8(s) - \frac{\kappa_9 \kappa_{12}}{\kappa_{10}} \cdot \frac{\bar{Z}_2^2(s)}{\bar{Z}_8^2(s)} U_9(s) \\ \frac{\kappa_2 \kappa_6}{\kappa_2 + \kappa_3} U_{23}(s) - \kappa_{18} U_4(s) \\ \frac{\kappa_2 \kappa_5}{\kappa_2 + \kappa_3} U_{23}(s) - \kappa_{16} U_5(s) \\ -\frac{\kappa_2 \kappa_7}{\kappa_2 + \kappa_3} U_{23}(s) - \kappa_{11} U_8(s) \\ \frac{\kappa_2 \kappa_7}{\kappa_2 + \kappa_3} U_{23}(s) \end{bmatrix} ds.$$

Noise of the error between  $V_0^N$  and  $V_0$  comes from two sources: one from the Poisson noise of  $V_0^N$  due to the corresponding reactions and the other from a difference between the drift term of  $V_0^N$  and its averaged behavior. In the case for  $\gamma = 2$ , we find that the noise of the error mainly comes from the Poisson noise of  $V_0^N$  and is dominantly determined by the error between  $Z_{23}^{N,2}(t)$  and  $Z_{23}^2(t)$ , since the species number of  $S_{23}$  has lower order of magnitude than those for  $S_4$ ,  $S_5$ ,  $S_8$ , and  $S_9$ . Errors are estimated using the central limit theorem derived in [4]. A detailed proof is omitted.

## References

1. Srivastava R, Peterson M, Bentley W: **Stochastic kinetic analysis of the Escherichia coli stress circuit using  $\sigma^{32}$ -targeted antisense**. *Biotechnol Bioeng* 2001, **75**:120–129.
2. Kang HW, Kurtz T: **Separation of time-scales and model reduction for stochastic reaction networks** 2012. [To appear in *Annals of Applied Probability* (accepted). Online publication can be found in [http://www.imstat.org/aap/future\\_papers.html](http://www.imstat.org/aap/future_papers.html). Preprint can be found in <http://arxiv.org/abs/1011.1672>].
3. Athreya K, Kurtz T: **A generalization of Dynkin's identity and some applications**. *The Annals of Probability* 1973, **1**(4):570–579.
4. Kang HW, Popovic L, Kurtz T: **Central limit theorems and diffusion approximations for multiscale Markov chain models** 2012. [Submitted. Preprint can be found in <http://arxiv.org/abs/1208.3783>].
